# Supplementary material for: Magnesium hydride-induced hydrogen therapy for enhanced sonodynamic therapy
Source: Royal Society of Chemistry journal article supplement (doi:10.1039/d5mh00585j), 2025-01-01
Supplement: d5mh00585j1.pdf [file d5mh00585j1.pdf]

## Magnesium hydride induced hydrogen therapy for enhanced sonodynamic therapy

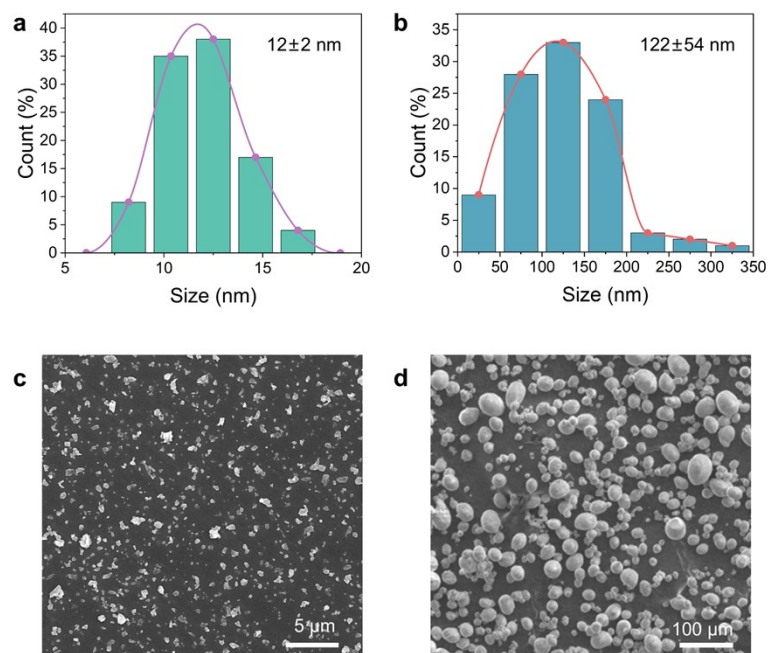

**Figure S1.** Particle-size distribution of (a) BTO nanoparticles and (b) MgH<sub>2</sub> particles. The SEM images of (c) MgH<sub>2</sub> nanoparticles and (d) MgH<sub>2</sub> powders.

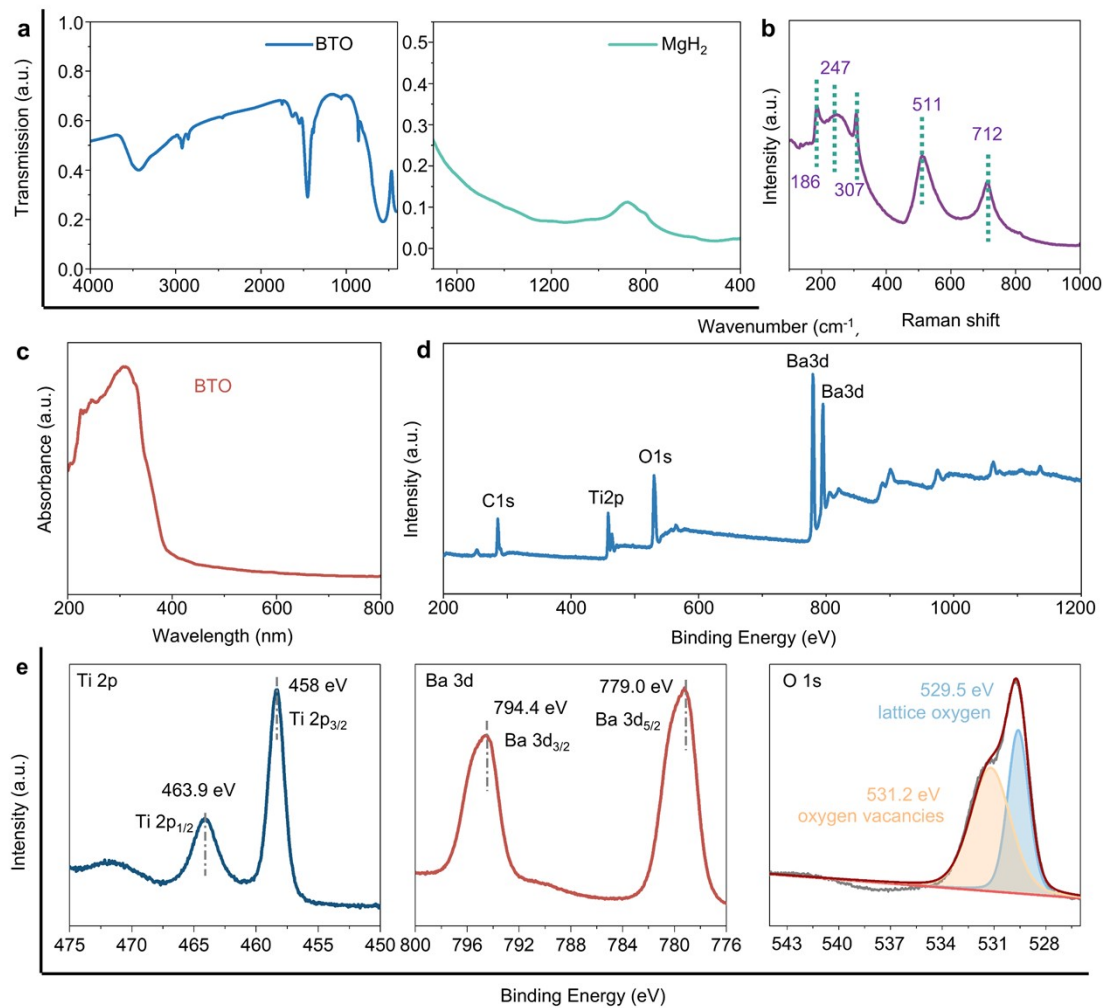

**Figure S2.** FTIR of (a) BTO nanoparticles and  $\text{MgH}_2$  microparticles. (b) Raman spectra of BTO nanoparticles. (c) UV-vis absorption spectrum of BTO nanoparticles. XPS spectra of (d) BTO nanoparticles and (e) Ba 3d, Ti 2p, Pd 3d, and O 1s.

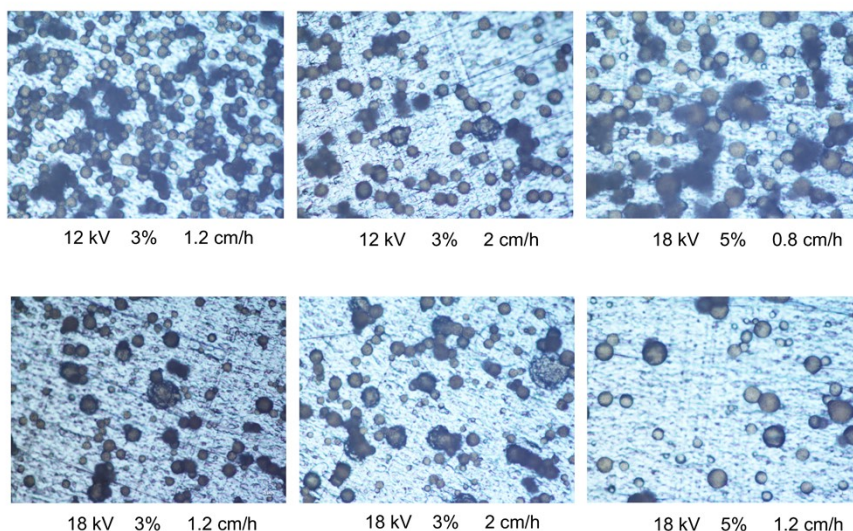

**Figure S3.** The photograph of  $\text{MgH}_2$  microspheres under different parameters of electrospaying.

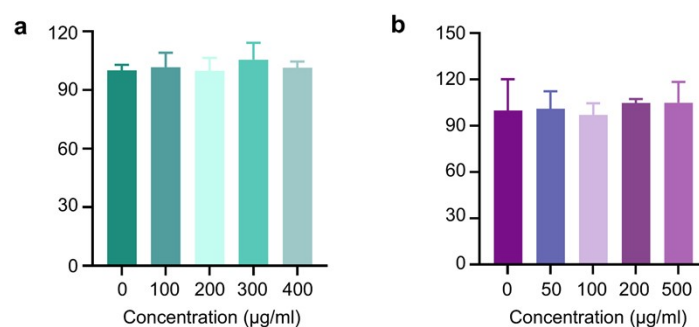

**Figure S4.** Relative viability of Hacat cells after incubation with various concentrations of (a)  $\text{MgH}_2$  particles and (b) BTO nanoparticles.

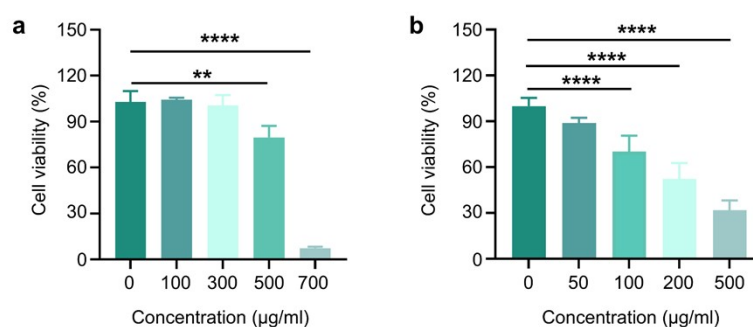

**Figure S5.** Relative viabilities of B16F10 cells after incubation with various concentrations of (a)  $\text{MgH}_2$  particles and (b) BTO nanoparticles under US irradiation.

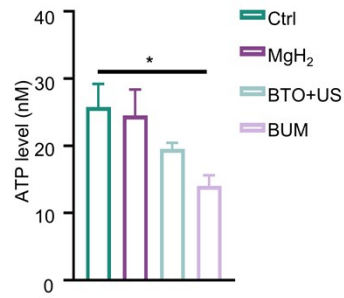

**Figure S6.** The intracellular ATP levels of B16F10 cells after different treatments. \*P < 0.05, \*\*P < 0.01, \*\*\*P < 0.001.

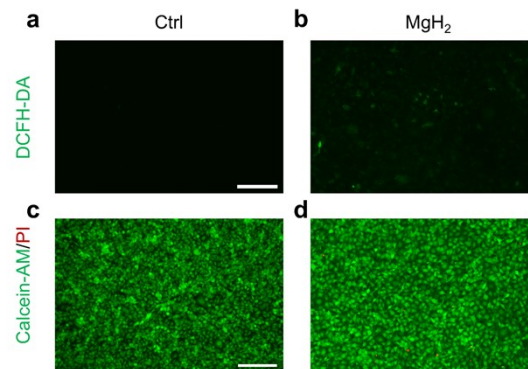

**Figure S7.** (a-b) The levels of ROS in B16F10 cells after different treatments were detected by DCFH-DA staining (scale bar = 200  $\mu$ m). (c-d) Calcein-AM/PI fluorescence images of B16F10 cells after different treatments. Live cells (green) and dead cells (red) were detected by Calcein-AM/PI staining, respectively (scale bar = 200  $\mu$ m).

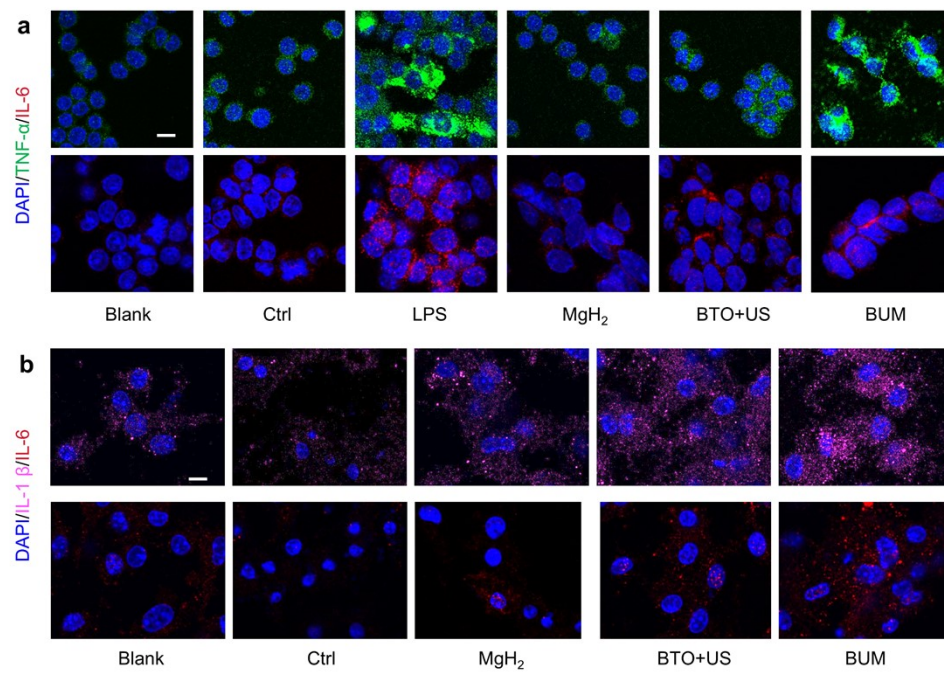

**Figure S8.** CLSM images of (a) RAW 264.7 cells and (b) primary macrophages (scale bar = 10  $\mu$ m).

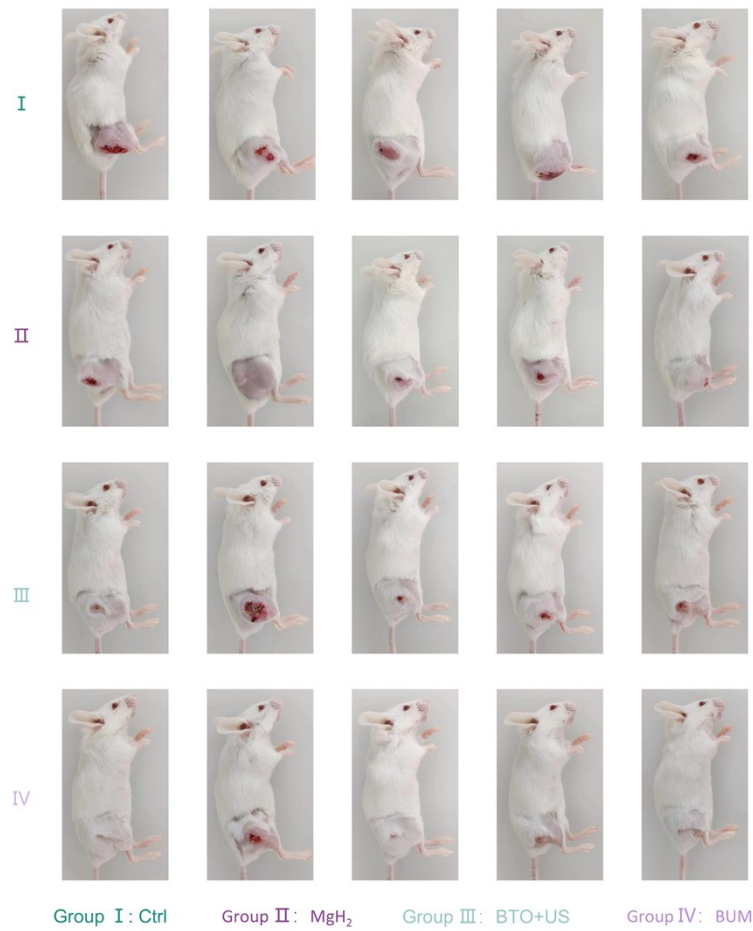

**Figure S9.** The photograph of CT26 tumor-bearing mice after different treatments (n=5).

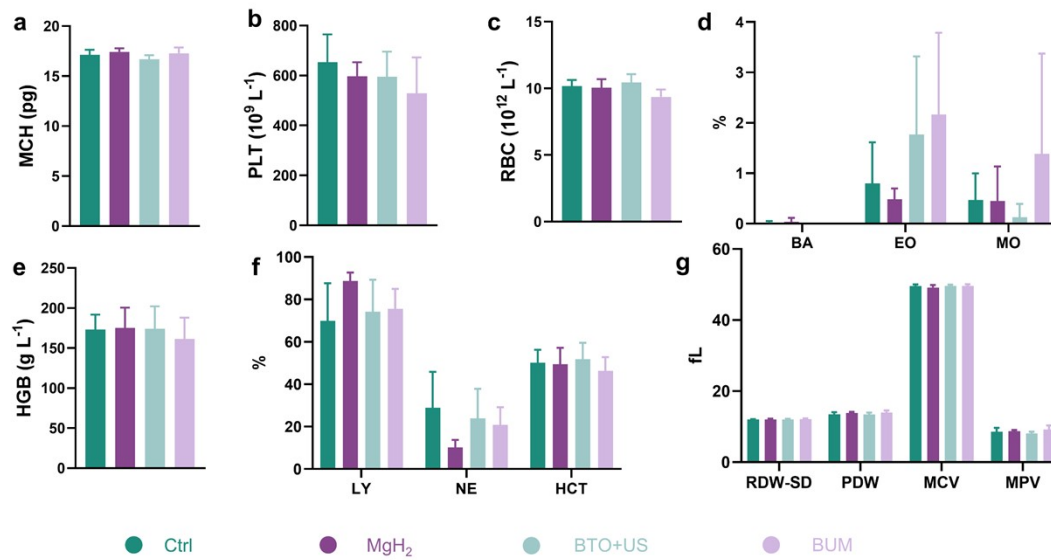

**Figure S10.** The blood routine indexes analysis (including mean corpuscular hemoglobin [MCH], platelets [PLT], red blood cells [RBC], basophil [BA], eosinophilic granulocyte [EO], monocyte [MO], hemoglobin [HGB], lymphocyte [LY], neutrophilic granulocyte [NE], hematocrit [HCT], standard deviation of red blood cell distribution width [RDW-SD], platelet distribution width [PDW], mean corpuscular volume [MCV] and mean platelet volume [MPV]) of the mice after different treatments.

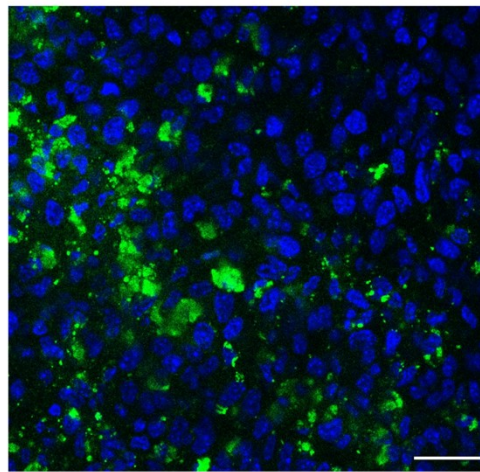

DAPI/FITC-BTO

**Figure S11.** The fluorescence imaging demonstrates the tumor distribution profile of FITC-conjugated BTO nanoparticles (scale bar=25  $\mu m$ ).

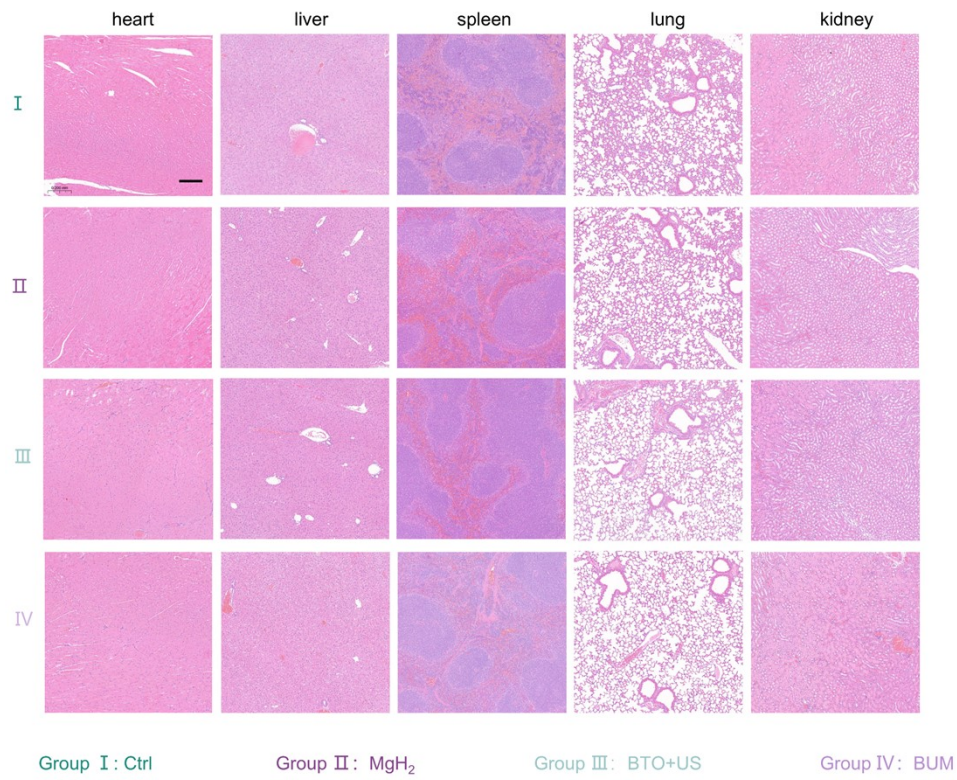

**Figure S12.** H&E staining of the major organs of the mice after different treatments (scale bar= 200  $\mu$ m).

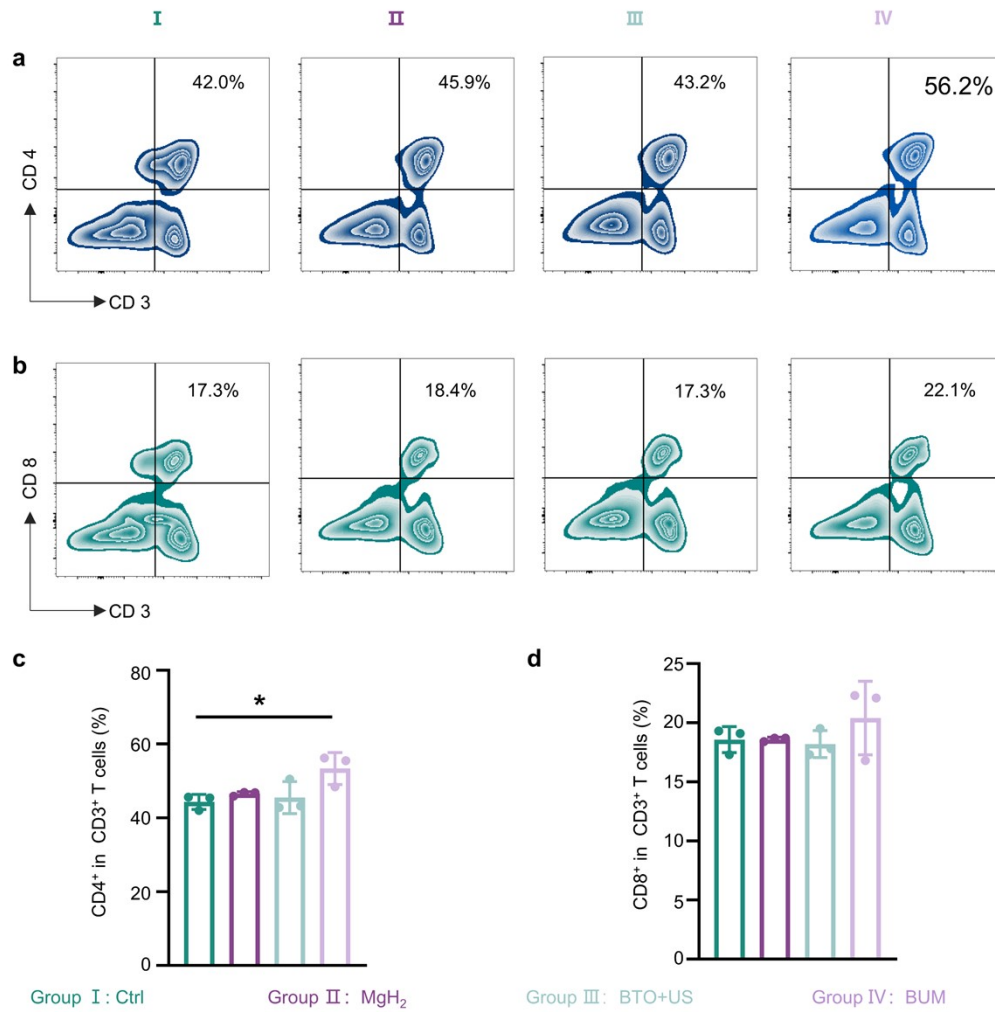

**Figure S13.** (a) The flow cytometric analysis results and (c) quantification results of CD4<sup>+</sup> T cells (CD45<sup>+</sup>CD3<sup>+</sup>CD4<sup>+</sup> within the lymph node after different treatments (n=3). (b) The flow cytometric analysis results and (d) quantification results of CD8<sup>+</sup> T cells (CD45<sup>+</sup>CD3<sup>+</sup>CD8<sup>+</sup>) within the lymph node after different treatments (n=3).

12 h

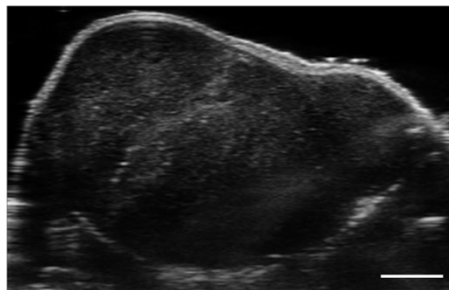

**Figure S14.** Ultrasonic imaging of CT26 tumor-bearing mice after injection of PEG 200 for 12 h only (scale bar = 3 mm).

## **Experimental section**

### **Murine immune cell subset characterization in vivo**

Treg cells: CD45-PE-Cy7, CD3-perCP-Cy5.5, CD4-APC, Foxp3-PE, T cells: CD45-PE-Cy7, CD3-perCP-Cy5.5, CD4-APC, CD8-FITC, M1 macrophages: CD45-PE-Cy7, CD11b-BV650, F4/80-BV510, CD80-FITC, M2 macrophages: CD45-PE-Cy7, CD11b-BV650, F4/80-BV510, CD206-APC, PD-1 expression: CD45-PE-Cy7, CD3-perCP-Cy5.5, aPD-1-PE.
